# Supplementary material for: A cross-sectional study of anxiety and depression caseness in female competitive figure skaters in Sweden
Source: HighWire-hosted journal article supplement (doi:10.1136/bmjsem-2022-001491), 2023-03-01
Supplement: bmjsem-2022-001491supp001_data_supplement.pdf [file bmjsem-2022-001491supp001_data_supplement.pdf]

**Supplementary Table I.** Characteristics of participants (n=137).

|                                                                     | Participants<br>n (%) |
|---------------------------------------------------------------------|-----------------------|
| <b>The family's financial situation (n=90) †</b>                    |                       |
| Very good                                                           | 54 (60)               |
| Fairly good                                                         | 30 (33)               |
| Some or major financial difficulties                                | 5 (6)                 |
| <b>Support from family and friends (n=90) †, ‡</b>                  |                       |
| My family really tries to help me                                   | 75 (83)               |
| I get the emotional help and support I need from my family          | 68 (76)               |
| I can talk about my problems with my family                         | 64 (71)               |
| My family is willing to help me make decisions                      | 66 (73)               |
| My friends really try to help me                                    | 61 (68)               |
| I can count on my friends when things go wrong†                     | 60 (67)               |
| I have friends with whom I can share my joys and sorrows            | 69 (77)               |
| I can talk about my problems with my friends                        | 62 (69)               |
| <b>Ever experienced bullying in connection with figure skating</b>  |                       |
| Yes                                                                 | 14 (10)               |
| No                                                                  | 123 (90)              |
| <b>Skipping snacks on weekdays</b>                                  |                       |
| Not skipping snacks on weekdays                                     | 98 (72)               |
| ≥1 weekday(s)                                                       | 39 (28)               |
| <b>Skipping snacks on weekends</b>                                  |                       |
| Not skipping snacks on weekends                                     | 50 (36)               |
| ≥1 day(s) on weekends                                               | 87 (64)               |
| <b>Eating fruits</b>                                                |                       |
| ≥1 time(s) per day                                                  | 48 (35)               |
| 2-6 days per week                                                   | 68 (50)               |
| ≤1 per week                                                         | 21 (15)               |
| <b>Eating vegetables</b>                                            |                       |
| ≥1 time(s) per day                                                  | 79 (58)               |
| 2-6 days per week                                                   | 45 (33)               |
| ≤1 per week                                                         | 13 (9)                |
| <b>Eating sweets</b>                                                |                       |
| ≥1 time(s) per day                                                  | 5 (4)                 |
| 2-6 days per week                                                   | 85 (62)               |
| ≤1 per week                                                         | 47 (34)               |
| <b>Consuming sweet drinks (n=136)</b>                               |                       |
| ≥1 time(s) per day                                                  | 26 (19)               |
| 2-6 days per week                                                   | 48 (35)               |
| ≤1 per week                                                         | 63 (46)               |
| <b>Use of dietary supplement (n=87) †</b>                           |                       |
| No                                                                  | 62 (71)               |
| Yes                                                                 | 25 (29)               |
| <b>Kind of supplement used (multiple options possible) (n=43) †</b> |                       |
| Energy drinks                                                       | 5 (12)                |
| Energy bars                                                         | 17 (40)               |
| Vitamin or mineral tablets                                          | 15 (35)               |
| Other (nutritional drinks, protein powder, lactic acid tablets)     | 6 (14)                |

SD=Standard Deviation.

† Question not asked to skaters &lt;12 years

‡ Multidimensional Perceived Social Support Scale (MPSS). Showing those answering a score of 6 or 7 (i.e., those that agree with the sentence).
